# Supplementary material for: Decision-Making Preferences among Advanced Cancer Patients in a Palliative Setting in Jordan
Source: MDPI journal article supplement (doi:10.3390/ijerph20085550), 2023-04-18
Supplement: s1 [file s1]

**Table S1.** Control Preference Scale (Patient–Family–Physician items) as defined by Yennurajalingam et al. in 2017 [9].

| <b>In my opinion, decisions about my care should be made (please choose ONLY ONE):</b> |
|----------------------------------------------------------------------------------------|
| 1. By myself.                                                                          |
| 2. By myself after hearing the doctor's opinion or input.                              |
| 3. By myself after hearing my family's opinion or input.                               |
| 4. By myself after hearing both my family's and the doctor's opinion or input.         |
| 5. By my family.                                                                       |
| 6. By my family after hearing my opinion or input.                                     |
| 7. By my family after hearing my doctor's opinion or input.                            |
| 8. By my family after hearing both my doctor's and my opinion or input.                |
| 9. By the doctor.                                                                      |
| 10. By the doctor after hearing my opinion or input.                                   |
| 11. By the doctor after hearing my family's opinion or input.                          |
| 12. By the doctor after hearing both my family's and my opinion or input.              |
| 13. Shared between myself and the doctor.                                              |
| 14. Shared between myself and my family.                                               |
| 15. Shared between myself and both my family and doctor.                               |

**Table S2.** Actual decision making scale (Patient–Family–Physician items) as defined by Yennurajalingam et al. in 2017 [9].

| <b>How were the decisions about your care actually made? (please choose ONLY ONE)</b> |
|---------------------------------------------------------------------------------------|
| 1. By myself.                                                                         |
| 2. By myself after hearing the doctor's opinion or input.                             |
| 3. By myself after hearing my family's opinion or input.                              |
| 4. By myself after hearing both my family's and the doctor's opinion or input.        |
| 5. By my family.                                                                      |
| 6. By my family after hearing my opinion or input.                                    |
| 7. By my family after hearing my doctor's opinion or input.                           |
| 8. By my family after hearing both my doctor's and my opinion or input.               |
| 9. By the doctor.                                                                     |
| 10. By the doctor after hearing my opinion or input.                                  |
| 11. By the doctor after hearing my family's opinion or input.                         |
| 12. By the doctor after hearing both my family's and my opinion or input.             |
| 13. Shared between myself and the doctor.                                             |
| 14. Shared between myself and my family.                                              |
| 15. Shared between myself and both my family and doctor.                              |

**Table S3.** Control Preference Scale (Patient–Physician items) as defined by Yennurajalingam et al. in 2017 [9].

|                                                                                                         |
|---------------------------------------------------------------------------------------------------------|
| 1. I would prefer to make the treatment decisions on my own.                                            |
| 2. I would prefer to make the treatment decisions by myself after hearing my doctor's opinion or input. |
| 3. I would prefer to make the decisions together with my doctor.                                        |
| 4. I would prefer that the doctor make the decisions after talking to me and hearing my opinion.        |
| 5. I would prefer that my doctor make the decisions on his/her own.                                     |

**Table S4.** Control Preference Scale (Patient–Family items) as defined by Yennurajalingam et al. in 2017 [9].

|                                                                                                         |
|---------------------------------------------------------------------------------------------------------|
| 1. I would prefer to make the treatment decisions on my own.                                            |
| 2. I would prefer to make the treatment decisions by myself after hearing my family's opinion or input. |

|                                                                                                 |
|-------------------------------------------------------------------------------------------------|
| 3. I would prefer to make the decisions together with my family.                                |
| 4. I would prefer that my family make the decisions after talking to me and hearing my opinion. |
| 5. I would prefer that my family make the decisions on his/her/their own.                       |

**Table S5.** Patients' satisfaction with decision-making as as difined by Yennurajalingam et al. in 2017 [9].

| Please Rate your Agreement with the Following Statements         |                          |               |                |                       |
|------------------------------------------------------------------|--------------------------|---------------|----------------|-----------------------|
|                                                                  | 0<br>Completely disagree | 1<br>Disagree | 2<br>Undecided | 3<br>Agree            |
| a. I am satisfied with the information I received about my care  |                          |               |                | 4<br>Completely Agree |
| b. I am satisfied with the way decisions about my care were made |                          |               |                |                       |
| c. I am satisfied with the decisions about my care               |                          |               |                |                       |

**Table S6.** Performance status as defined by Karnofsky, Burchenal, and their colleagues in 1948.

| Definition                                                                                                          | Performance Status % | Criteria                                                                     |
|---------------------------------------------------------------------------------------------------------------------|----------------------|------------------------------------------------------------------------------|
| Able to carry on normal activity and to work. No special care is needed.                                            | 100%                 | Normal; no complaints; no evidence of disease.                               |
|                                                                                                                     | 90%                  | Able to carry on normal activity; minor signs or symptoms of disease.        |
|                                                                                                                     | 80%                  | Normal activity with effort; some signs or symptoms of disease.              |
| Unable to work. Able to live at home, care for most personal needs. A varying amount of assistance is needed.       | 70%                  | Cares for self. Unable to carry on normal activity or to do active work.     |
|                                                                                                                     | 60%                  | Requires occasional assistance, but is able to care for most of his needs.   |
|                                                                                                                     | 50%                  | Requires considerable assistance and frequent medical care.                  |
| Unable to care for self. Requires equivalent of institutional or hospital care. Disease may be progressing rapidly. | 40%                  | Disabled; requires special care and assistance.                              |
|                                                                                                                     | 30%                  | Severely disabled; hospitalization is indicated although death not imminent. |
|                                                                                                                     | 20%                  | Very sick; hospitalization necessary; active supportive treatment necessary. |
|                                                                                                                     | 10%                  | Moribund; fatal processes progressing rapidly.                               |
|                                                                                                                     | 0%                   | Dead.                                                                        |
